# Supplementary material for: The comprehensive model system COSMO-ART – Radiative impact of aerosol on the state of the atmosphere on the regional scale
Source: Copernicus journal article supplement (doi:10.5194/acp-9-8661-2009), 2009-11-16
Supplement: Supplementary file 1 [file acp-9-8661-2009-supplement.pdf]

## Supplemental material

30. AUG 2005, 12 UTC

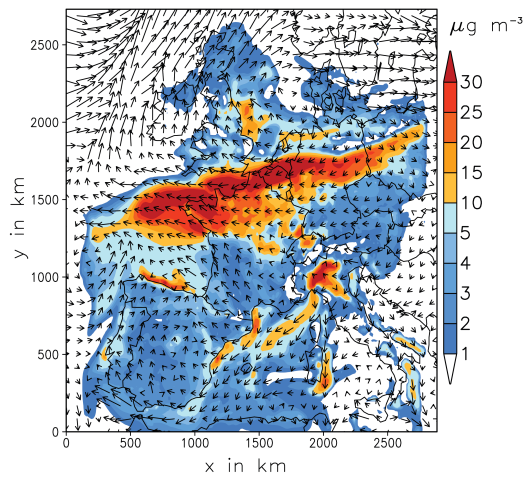

18. AUG 2005, 12 UTC

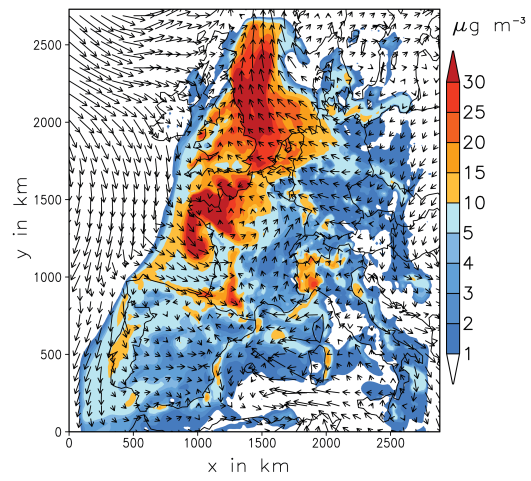

31. AUG 2005, 12 UTC

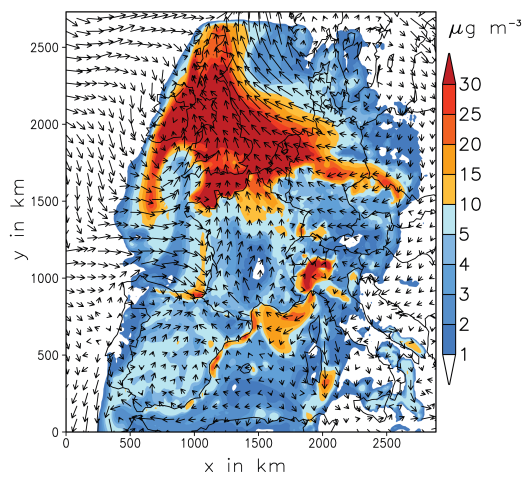

19. AUG 2005, 12 UTC

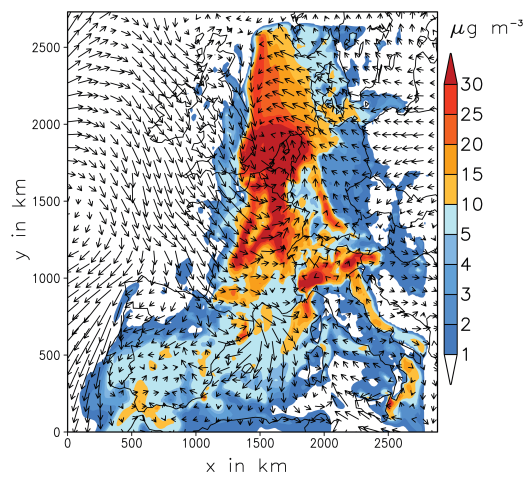

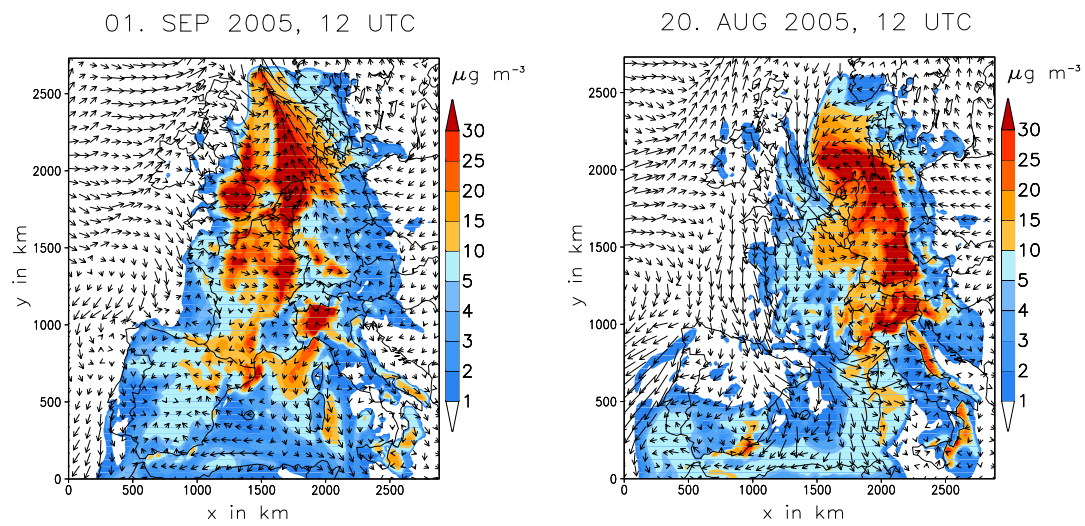

Fig. S1. Simulated total dry aerosol mass and horizontal wind vectors at 20 m above surface.

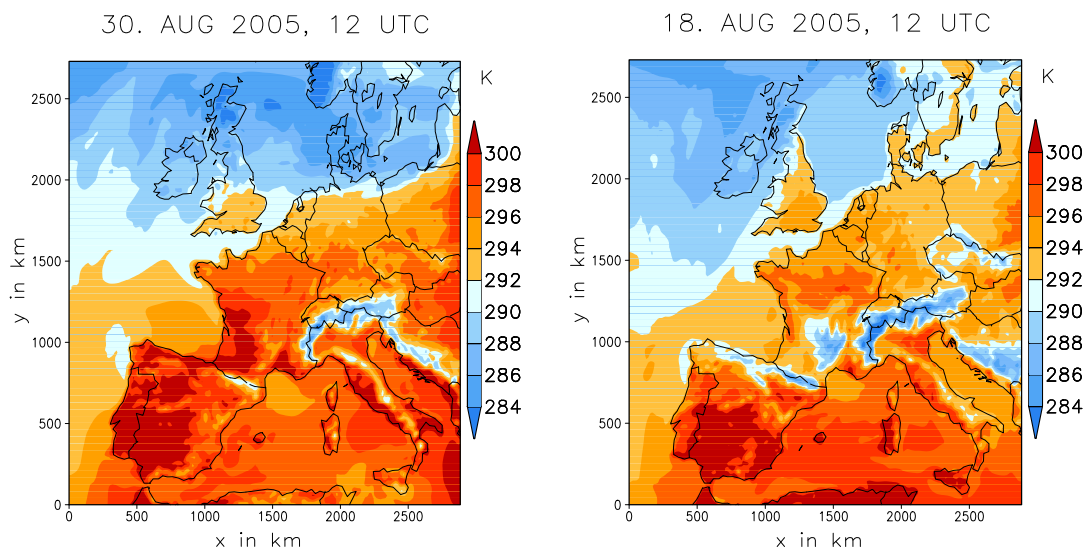

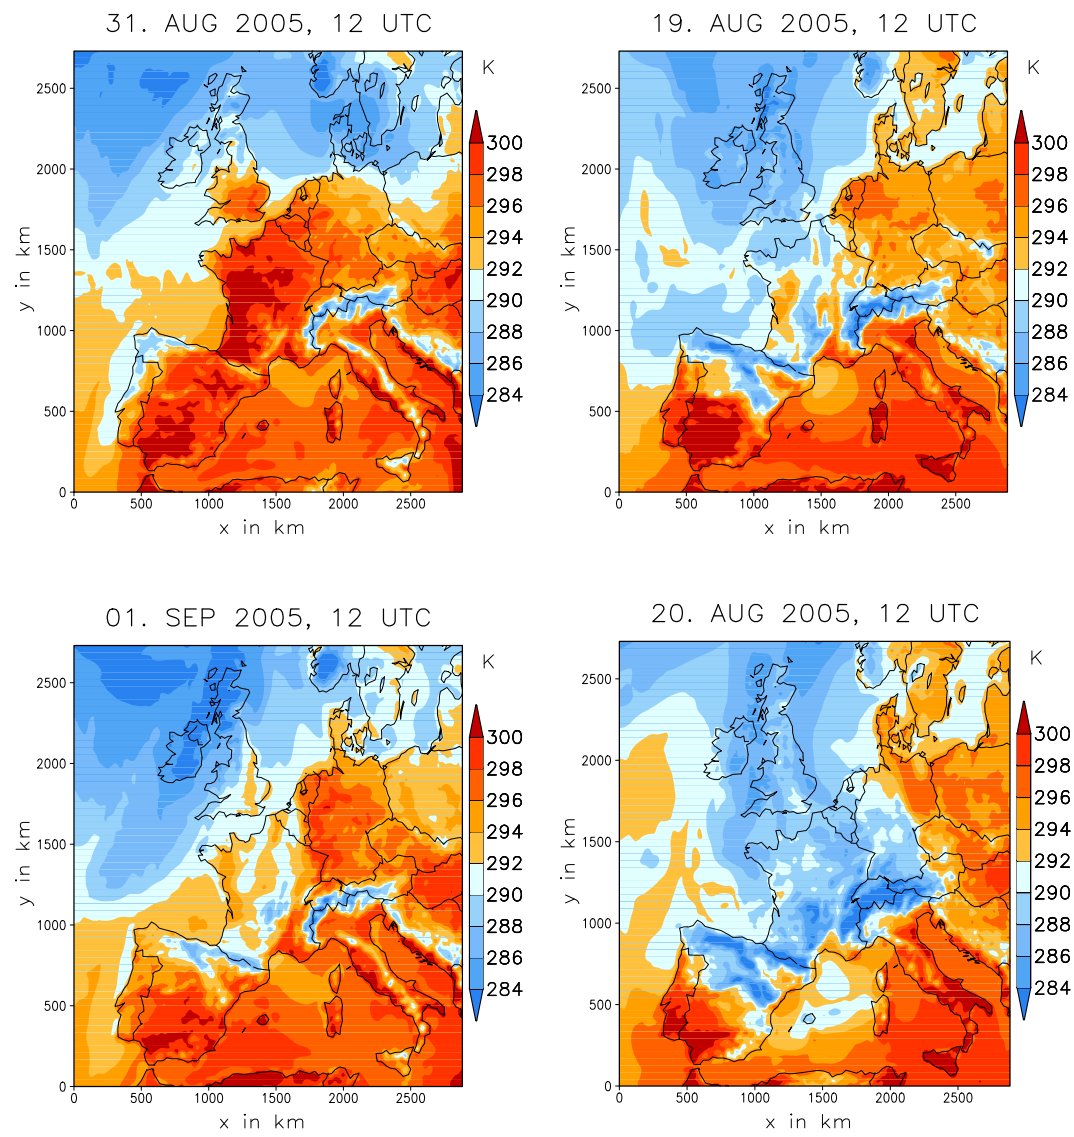

Fig. S2. Simulated temeprature at 20 m above surface.

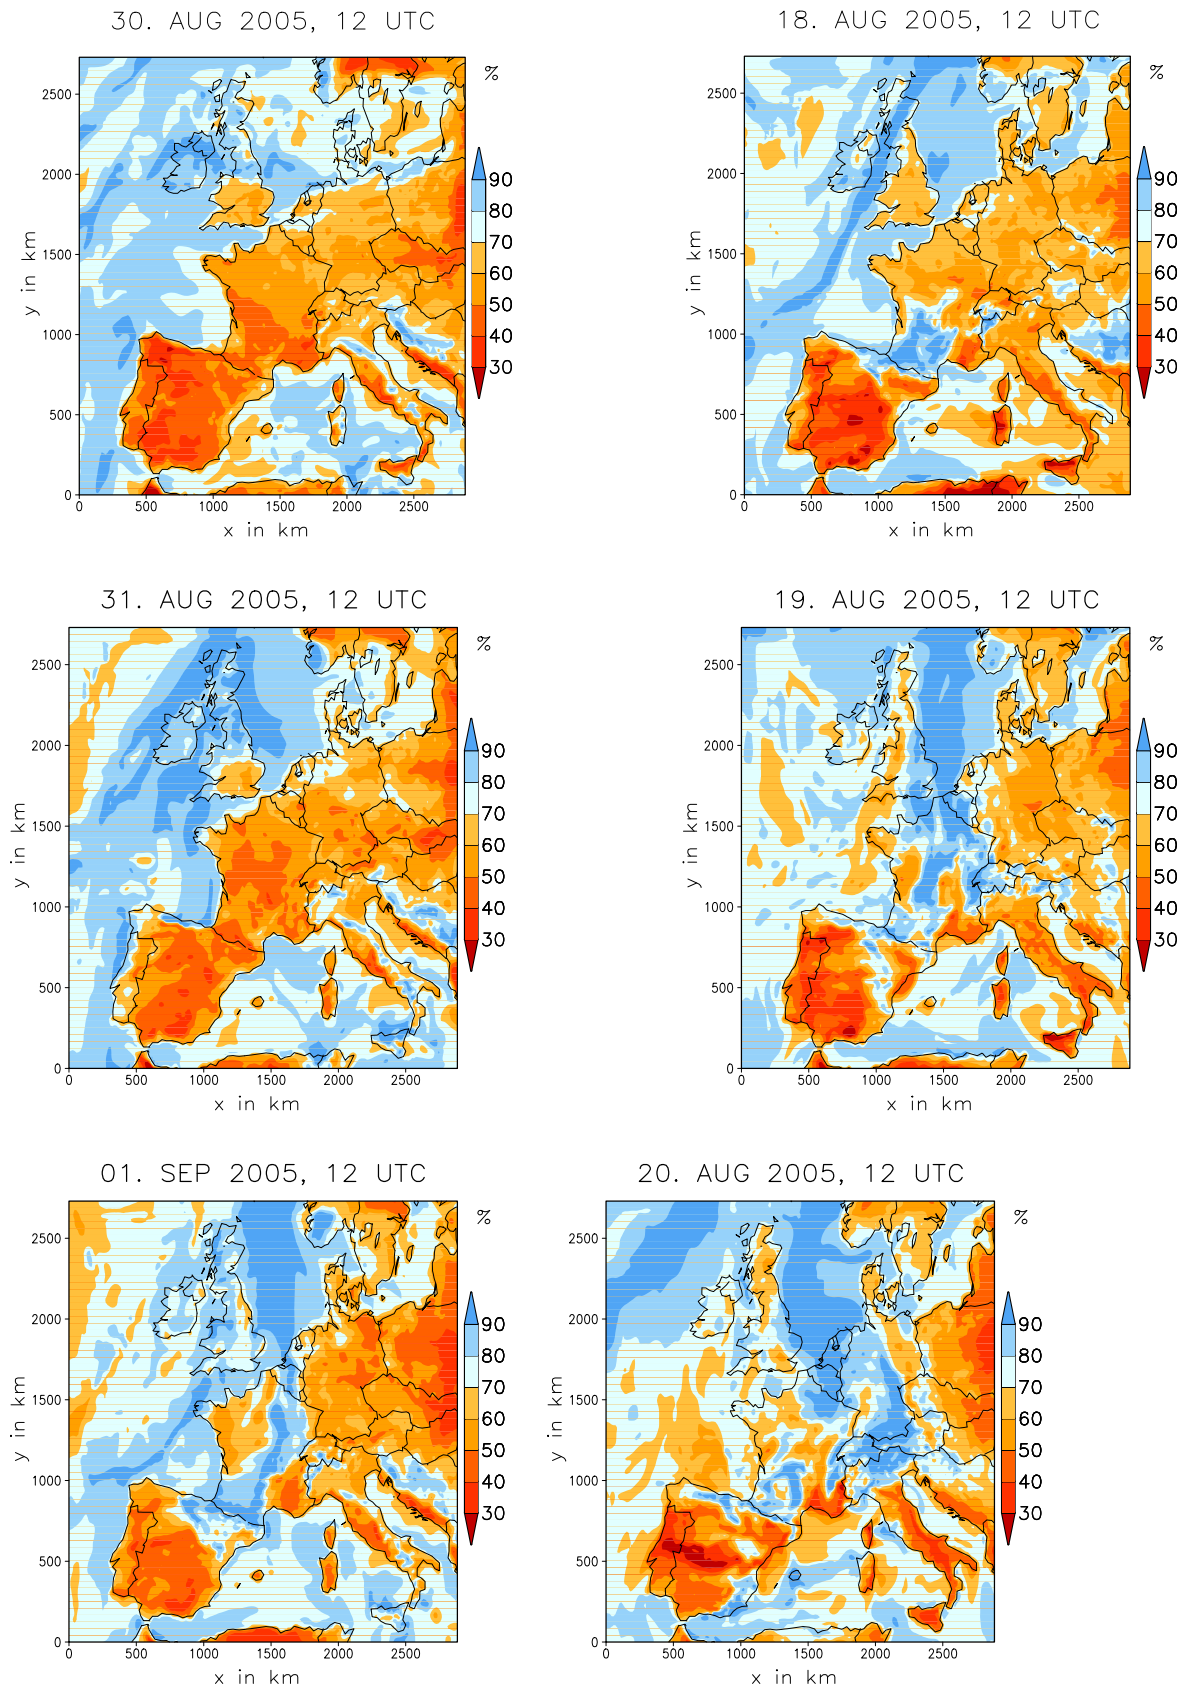

Fig. S3. Simulated relative humidity at 20 m above surface.
